# Supplementary material for: Natural impaired peroxisomal side-chain shortening reaction of 3-oxo-3-phenylpropanoyl CoA reveals plant acetophenone biosynthetic pathway
Source: Research Square preprint supplement (doi:10.21203/rs.3.rs-5340533/v1), 2024-11-10
Supplement: Supplementary file 1 [file 25737c8b43e2e2b74a4ee764.xlsx]

## Sheet: Sheet1
			Genotype
				low 4HAP-G					Hight 4HAP-G
InDel markers	#CHROM	POS	SuliOP729	SY	D19	D33	D39		D21
M1	Chr5	17496669	CCTTG/C	CCTTG/CCTTG	CCTTG/CCTTG	CCTTG/CCTTG	CCTTG/CCTTG		CCTTG/CCTTG
M2	Chr5	18156104	ACACG/ACACG	ACACG/A	ACACG/ACACG	ACACG/A	ACACG/A		ACACG/A
M3	Chr5	18909517	GTATAAGAAAAATTATGGTTGTGCCCAAACCTAA/GTATAAGAAAAATTATGGTTGTGCCCAAACCTAA	GTATAAGAAAAATTATGGTTGTGCCCAAACCTAA/G	GTATAAGAAAAATTATGGTTGTGCCCAAACCTAA/GTATAAGAAAAATTATGGTTGTGCCCAAACCTAA	GTATAAGAAAAATTATGGTTGTGCCCAAACCTAA/G	GTATAAGAAAAATTATGGTTGTGCCCAAACCTAA/G		GTATAAGAAAAATTATGGTTGTGCCCAAACCTAA/G
M4	Chr5	19081881	ACGT/ACGT	ACGT/A	ACGT/ACGT	ACGT/ACGT	ACGT/A		ACGT/A
M5	Chr5	19550508	C/CTGGGAAG	CTGGGAAG/CTGGGAAG	C/CTGGGAAG	C/CTGGGAAG	C/CTGGGAAG		CTGGGAAG/CTGGGAAG
M6	Chr5	19685574	CACTACA/C	C/C	CACTACA/C	CACTACA/C	CACTACA/C		C/C
M7	Chr5	19854195	C/CCTT	CCTT/CCTT	C/CCTT	C/CCTT	C/CCTT		CCTT/CCTT
M8	Chr5	20197979	TACTGTTGAGA/T	T/T	TACTGTTGAGA/T	TACTGTTGAGA/T	TACTGTTGAGA/T		TACTGTTGAGA/T
